# Supplementary material for: Cord care practices and related outcomes among caregivers in two referral facilities in Ghana: a cross-sectional study
Source: Research Square preprint supplement (doi:10.21203/rs.3.rs-6401569/v1), 2025-05-12
Supplement: Supplementary file 1 [file d21818ca3a858ea4c3b3be53.docx]

**KWAME NKRUMAH UNIVERSITY OF SCIENCE AND TECHNOLOGY/COLLEGE OF HEALTH SCIENCES/SCHOOL OF PUBLIC HEALTH/DEPARTMENT OF HEALTH POLICY MANAGEMENT AND ECONOMICS**

**Research title: Cord care practices and related outcomes among caregivers in two referral facilities in Ghana: a cross-sectional study**

**QUESTIONNAIRE FOR CAREGIVERS/MOTHERS ON METHODS OF UMBILICAL CORD CARE AND RELATED OUTCOMES**

**Introduction**

Good morning/afternoon. I am a student of the School of Public Health, KNUST. I will be collecting information from you in the Kumasi South/Ejisu Government Hospital on cord care practices and related outcomes among caregivers in two referral facilities in Ghana: a cross-sectional study**.** Your opinions are very important and welcomed because they will help us to improve the kind of health service we provide. Feel free to voice your honest opinion because all you say will be kept confidential. Please rest assured that your responses won't be connected in any way to your identity. Please answer the questions below by checking the appropriate box or writing the required response.

1. **DEMOGRAPHICS**
2. Facility: Kumasi South Hospital Ejisu Government Hospital
3. Age of caregiver ……….
4. Age of baby………….
5. Place of residence…………………….......
6. Level of education

No formal education Primary school J.H.S S.H.S Tertiary

1. Occupation

Unemployed Artisan Farming/fishing Trader

Civil/Public servant: State rank/position ……..……………………………………………………

Private company as an/a: …….……………...………… Other: …….……………………

1. Marital status

Single Married Divorced Widow other………

1. Religion

Christian Moslem traditionalist other …………….

1. Personal monthly income…………………
2. Parity (number of children delivered) …………………
3. **CORD CARE METHODS AND PRACTICES**
4. Where was the delivery of this baby done?

In a hospital Other: …………………………………………………………….…

1. Did you attend antenatal clinic when you were pregnant? Yes…. No
2. Who did the delivery of this baby

Midwife Other: ………………………………………………………………..

1. What was used to tie the baby’s cord?

Clamp Thread Don’t know Other: …………………….……

1. What was used to clean your baby’s cord?

Nothing Methylated spirit Herbs Other: ………………

1. What was applied to the cord after cleaning?

- Nothing Antibiotic Herbs Other: …………………………..

is this your usual practice? If No, how do you usually manage the umbilical cord?

1. Was the cord exposed after cleaning it?

Yes No

1. Who recommended the cord care method that was used?

Health staff Relative Other: ……………………

1. How many days did it take for the cord to fall off? ………………….
2. Was hand washing done before cleaning the cord?

Yes No

1. If yes, how often?

All the time Most times Sometimes Once in a while

1. Was hand washing done after cleaning the cord?

Yes No

1. If yes, what was used for handwashing, before the cleaning of the cord?

Water and soap Water only Sanitizer Other: ………….………………

1. How often was cord care done?

Once a day Morning & evening After every diaper change Other: ………….**.**

1. What factors will influence your choice of method to manage the umbilical cord?

Previous experience cost advice from head of family other…….., ……..

1. **OUTCOME OF THE METHODS OF CORD CARE PRACTICE**
2. Was cord bleeding experienced with this baby?

Yes No

1. If Yes, what was done: …………………………………………………………………………….
2. Did baby have cord granuloma?

Yes No

1. If Yes, what was done? …………………………………………………………………………….
2. Did the baby have a discharge from the cord?

Yes No

1. If Yes, what was done? …………………………………………………………………………….
2. Was there reddening around the cord?

Yes No

1. If Yes, what was done? …………………………………………………………………………….
2. Were you told by health staff that the baby had complications with the cord?

Yes No

If yes, what was it?.................................................................

What was done?.................................................................................................

1. Did you observe any(other) complications?

Yes No

1. If Yes, what was it and what was done? …………………………………………………………………………….
2. When did the cord finally heal?

1 – 2 weeks 2 – 3 weeks 3 – 4 weeks > 4 weeks

1. Were you satisfied with how the cord turned out?

Yes No

1. If No, what were you not happy about? …………………………………………………...
2. What were you told/given by the health care worker to be used for the cord care? ………………..…
3. Did you use the one recommended by the health worker?

Yes No

1. If No, why didn’t you use it? …………………………………………………………….………….…
2. If you have an older child, what was used for his/her cord care? …………………………………
3. Who recommended that method?................................................................
4. Were you satisfied with the cord outcome for the older child?

Yes No Other

1. **KNOWLEDGE ON CURRENT CORD CARE GUIDELINES**

**Current guidelines on cord care include:**

1. Applying nothing to the cord till it falls off

Yes No

1. Applying methylated spirit to the cord daily till it falls off

Yes No

1. Applying chlorhexidine to the cord daily till it falls off

Yes No

1. Cleaning the cord stump with warm water daily till it falls off

Yes No

1. Method of cord cleaning

Clean stump before the base

Clean base before stump

Clean base only

Clean stump only

Other…………………..

1. Use herbs only on cord

Yes No

1. **BENEFITS OF PROPER CORD CARE INCLUDE:**
2. Proper cord care can prevent cord infection

Yes No

1. Proper cord care can reduce the risk of death in babies

Yes No

1. Proper cord care can result in quick drying and separation of cord.

Yes No

Thank you for your time.
